# Supplementary material for: Advancing peptide siRNA-carrier designs through L/D-amino acid stereochemical modifications to enhance gene silencing
Source: PubMed Central journal article supplement — Mol Ther Nucleic Acids. 2021 Mar 19;24:462–76. doi: 10.1016/j.omtn.2021.03.013 (PMC8040110; doi:10.1016/j.omtn.2021.03.013), 2021-03-19
Supplement: mmc1.pdf [file mmc1.pdf]

**OMTN, Volume 24**

**Supplemental information**

**Advancing peptide siRNA-carrier designs  
through L/D-amino acid stereochemical  
modifications to enhance gene silencing**

**Charles E. Holjencin, Colton R. Feinberg, Travis Hedrick, Gregory Halsey, Robert D. Williams, Priya V. Patel, Evan Biles, James C. Cummings, Chance Wagner, Naren Vyavahare, and Andrew Jakymiw**

## SUPPLEMENTAL INFORMATION

### Supplemental Figures & Legends

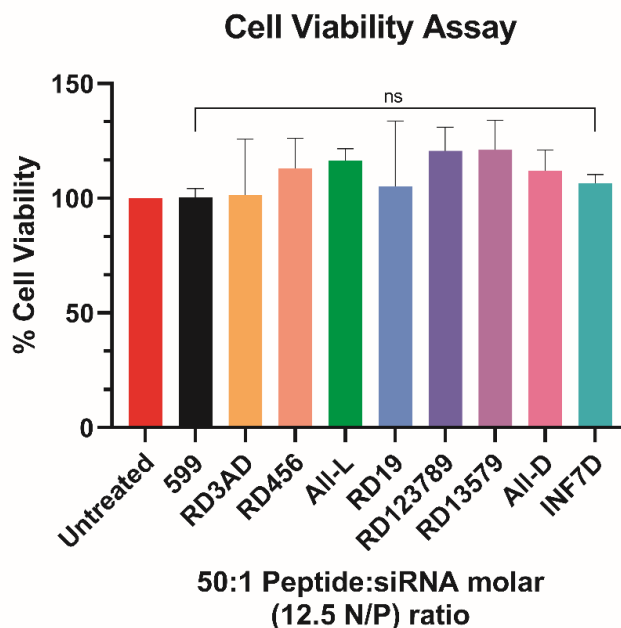

**Figure S1. Assessment of cytotoxicity after treatment of cancer cells with 599 or its peptide variants in complex with siRNA in comparison to untreated cells.** The long-term cellular toxicity (as measured by a cell proliferation assay) of CAL 27 cancer cells was assessed 48 hours post-treatment with 599 or its peptide variants in complex with a non-targeting siRNA (siNT) at 50:1 Peptide:siRNA molar (12.5 N/P) ratios. Untreated cells were defined as 100% viable. Data are mean  $\pm$  SEM of three independent samples, where  $P \geq 0.05$  is not significant (ns) compared to untreated cells (one-way ANOVA).

### Supplemental Tables

**Table S1. Raw data from siRNA binding assays.** Please see accompanying Excel file for details.

**Table S2. Raw data from siRNA release assays.** Please see accompanying Excel file for details.
